# Supplementary material for: The emergence of bunched vowels from retroflex approximants in endangered Dardic languages
Source: publisher site journal article supplement (doi:10.1515/lingvan-2021-0022), 2022-04-28
Supplement: Supplementary file 2 [file Supplementary materials.pdf › Supplementary materials/Supplementary materials.pdf]

## **Supplementary Materials**

The emergence of bunched vowels from retroflex approximants in  
endangered Dardic languages

**Qandeel Hussain and Jeff Mielke**

Department of English (Linguistics Program)

North Carolina State University

Campus Box 8105, Raleigh, NC 27695, USA

Corresponding author

Qandeel Hussain

Department of Linguistics, University of Toronto, Sidney Smith Hall (4th floor),

100 St. George Street, Toronto, Ontario, M5S 3G3, Canada. Email:

[qandeel.hussain@utoronto.ca](mailto:qandeel.hussain@utoronto.ca)

Phonemic inventories of Dardic and Nuristani languages

Kalasha (Dardic)

Table 1: Phonemic inventory of Kalasha (Cooper 2005, Heegård & Mørch 2004, Kochetov et al. 2020).

|                     | Bilabial                           | Dental/Alveolar                                                                        | Palatalized alveolar | Retroflex                                  | Alveopalatal/Palatal                   | Velar                              | Glottal |
|---------------------|------------------------------------|----------------------------------------------------------------------------------------|----------------------|--------------------------------------------|----------------------------------------|------------------------------------|---------|
| Plosive             | p p <sup>h</sup> b b <sup>fi</sup> | t <sub>̱</sub> t <sub>̱</sub> <sup>h</sup> d <sub>̱</sub> d <sub>̱</sub> <sup>fi</sup> |                      | ṭ ṭ <sup>h</sup> ḍ ḍ <sup>fi</sup>     |                                        | k k <sup>h</sup> g g <sup>fi</sup> |         |
| Affricate           |                                    | ts ts <sup>h</sup> dz                                                                  |                      | t͡ʂ t͡ʂ <sup>h</sup> d͡ʂ d͡ʂ <sup>fi</sup> | tɕ tɕ <sup>h</sup> dɕ dɕ <sup>fi</sup> |                                    |         |
| Nasal               | m                                  | n                                                                                      |                      | ɳ                                          |                                        |                                    |         |
| Tap or flap         |                                    | r                                                                                      |                      |                                            |                                        |                                    |         |
| Fricative           | (f)                                | s z                                                                                    |                      | ʂ ʐ                                        | ɕ ʑ                                    | (x)                                | h       |
| Approximant         | w                                  |                                                                                        |                      |                                            | j                                      |                                    |         |
| Lateral approximant |                                    | ɭ                                                                                      | ɭʲ                   |                                            |                                        |                                    |         |

i ĩ i˘ i˘̃  
e ē e˘ e˘̃  
a ã a˘ a˘̃

u ũ u˘ u˘̃  
o õ o˘ o˘̃

## Dameli (Dardic)

Table 2: Phonemic inventory of Dameli (Perder 2013).

|             | Bilabial           | Dental             | Postalveolar | Retroflex          | Velar              |
|-------------|--------------------|--------------------|--------------|--------------------|--------------------|
| Plosive     | p p <sup>h</sup> b | t t <sup>h</sup> d |              | ʈ ʈ <sup>h</sup> ɖ | k k <sup>h</sup> g |
| Affricate   |                    | ts                 | tʃ           | tʂ                 |                    |
| Fricative   |                    | s z                | ʃ ʒ          | ʂ ʐ                | x ɣ                |
| Nasal       | m                  | n                  |              | ɳ                  |                    |
| Tap or flap |                    | r                  |              | ɽ                  |                    |
| Approximant | ʋ                  | l                  | j            | ɻ                  |                    |

i i

u

e e:

O!

a

a:

Kamviri (Nuristani)

Table 3: Phonemic inventory of Kamviri (Nelson 1986, Strand 2011a). Parentheses denote consonants which occur in loanwords.

|             | Bilabial | Dental | Postalveolar | Retroflex | Velar   |
|-------------|----------|--------|--------------|-----------|---------|
| Plosive     | p b      | t d    |              | ʈ ɖ       | k ɡ     |
| Affricate   |          | ts dz  | tʃ dʒ        | ʈʂ ɖʂ     |         |
| Fricative   | (f) v    | s (z)  | ʃ (ʒ)        | ʂ ʐ       | (x) (ɣ) |
| Nasal       | m        | n      |              | ɳ         | ŋ       |
| Tap or flap |          | r      |              | ɽ         |         |
| Lateral     |          | l      |              |           |         |
| Approximant |          |        | j            | ɻ         |         |

i i:

e e:

ü ü:

ə

a a:

u u:

o o:

Eastern Kataviri (Nuristani)

Table 4: Phonemic inventory of Eastern Kataviri (Nelson 1986, Strand 2011b). Parentheses denote consonants which occur in loanwords.

|             | Bilabial | Dental | Postalveolar | Retroflex | Velar   | Glottal | Uvular |
|-------------|----------|--------|--------------|-----------|---------|---------|--------|
| Plosive     | p b      | t d    |              | ʈ ɖ       | k ɡ     |         | (q)    |
| Affricate   |          | ts     | tʃ dʒ        | ʈʂ ɖʂ     |         |         |        |
| Fricative   | (f) v    | s z    | ʃ (ʒ)        | ʂ ʐ       | (x) (ɣ) | (h)     |        |
| Nasal       | m        | n      |              | ɳ         | ŋ       |         |        |
| Tap or flap |          | r      |              | ɽ         |         |         |        |
| Lateral     |          | l      |              |           |         |         |        |
| Approximant |          |        | j            | ɻ         |         |         |        |

i u  
e ə o  
a

Unlike Kalasha, which has no rhotic approximant phoneme apart from the rhotic vowels, the Nuristani languages it is in contact with have prevocalic and postvocalic retroflex approximants. While the postvocalic retroflex approximants are similar to the sequences that apparently gave rise to Kalasha rhotic vowels, by all accounts they appear as part of vowel-retroflex approximant sequences in these languages, and the retroflex approximants occur in non-postvocalic contexts such as Kataviri /ɽotr/ ‘night’ (Turner 1966 via Di Carlo 2016).

## Typological survey

The following table shows the names of all the Indo-Iranian varieties (Indo-Aryan, Iranian, and Nuristani), their geospatial coordinates, and the presence vs. absence (1 = present; 0 = absent) of retroflex approximants (/ɭ ɭʲ/) and flaps (/ɽ ɽʰ/).

|    | Language              | Phylum     | Latitude | Longitude | /ɭ/ | /ɭʲ/ | /ɽ/ | /ɽʰ/ |
|----|-----------------------|------------|----------|-----------|-----|------|-----|------|
| 1  | Aer                   | Indo-Aryan | 25.254   | 69.029    | 0   | 0    | 1   | 0    |
| 2  | Aleppo Domari         | Indo-Aryan | 36.20237 | 37.13577  | 0   | 0    | 0   | 0    |
| 3  | Assamese (Standard)   | Indo-Aryan | 26.0876  | 91.2932   | 0   | 0    | 0   | 0    |
| 4  | Awadhi                | Indo-Aryan | 27.5907  | 82.4663   | 0   | 0    | 1   | 1    |
| 5  | Bagri                 | Indo-Aryan | 28.6036  | 71.453    | 0   | 0    | 1   | 0    |
| 6  | Bahelia               | Indo-Aryan | 22.08032 | 82.14089  | 0   | 0    | 1   | 1    |
| 7  | Bangla (Standard)     | Indo-Aryan | 24       | 90        | 0   | 0    | 0   | 0    |
| 8  | Bangru                | Indo-Aryan | 28.61431 | 77.21721  | 0   | 0    | 1   | 0    |
| 9  | Barpetiya             | Indo-Aryan | 26.33019 | 91.00555  | 0   | 0    | 0   | 0    |
| 10 | Bateri                | Indo-Aryan | 34.94633 | 72.88554  | 0   | 0    | 1   | 0    |
| 11 | Bhili                 | Indo-Aryan | 20.85    | 73.9592   | 0   | 0    | 0   | 0    |
| 12 | Bhojpuri Sadani       | Indo-Aryan | 23.34    | 85.3      | 0   | 0    | 0   | 0    |
| 13 | Bhojpuri (Southern)   | Indo-Aryan | 26.45846 | 84.81712  | 0   | 0    | 1   | 1    |
| 14 | Bhuyan                | Indo-Aryan | 21.62756 | 85.58213  | 0   | 0    | 1   | 1    |
| 15 | Bishnapuriya Manipuri | Indo-Aryan | 24.62903 | 93.76665  | 0   | 0    | 0   | 0    |
| 16 | Brokskat              | Indo-Aryan | 34.5308  | 76.6026   | 0   | 0    | 0   | 0    |

|    |                  |            |          |          |   |   |   |   |
|----|------------------|------------|----------|----------|---|---|---|---|
| 17 | Bundeli          | Indo-Aryan | 24.74558 | 78.82999 | 0 | 0 | 0 | 0 |
| 18 | Carua Goalpara   | Indo-Aryan | 25.53493 | 89.86263 | 0 | 0 | 0 | 0 |
| 19 | Chakma           | Indo-Aryan | 23.00148 | 92.339   | 0 | 0 | 0 | 0 |
| 20 | Chhattisgarhi    | Indo-Aryan | 21.24349 | 81.62508 | 0 | 0 | 1 | 1 |
| 21 | Chitwan Tharu    | Indo-Aryan | 27.54647 | 84.43301 | 0 | 0 | 0 | 0 |
| 22 | Dameli           | Indo-Aryan | 35.4613  | 71.71771 | 1 | 0 | 1 | 0 |
| 23 | Dang Tharu       | Indo-Aryan | 27.8834  | 81.7761  | 0 | 0 | 0 | 0 |
| 24 | Dangi (Bhils)    | Indo-Aryan | 20.78428 | 73.67278 | 0 | 0 | 0 | 0 |
| 25 | Danuwar Rai      | Indo-Aryan | 27.56    | 85.03    | 0 | 0 | 0 | 0 |
| 26 | Darai            | Indo-Aryan | 27.8623  | 84.1357  | 0 | 0 | 0 | 0 |
| 27 | Desauriya Tharu  | Indo-Aryan | 28.10124 | 81.80566 | 0 | 0 | 0 | 0 |
| 28 | Deukhuri Tharu   | Indo-Aryan | 27.87527 | 82.5026  | 0 | 0 | 0 | 0 |
| 29 | Dhatki           | Indo-Aryan | 25.17918 | 69.56882 | 0 | 0 | 1 | 0 |
| 30 | Dhivehi          | Indo-Aryan | 1.928498 | 73.54433 | 0 | 0 | 1 | 0 |
| 31 | Dhundari         | Indo-Aryan | 26.473   | 76.198   | 0 | 0 | 1 | 0 |
| 32 | Dogri            | Indo-Aryan | 32.5534  | 75.7111  | 0 | 0 | 1 | 0 |
| 33 | Domaaki          | Indo-Aryan | 36.3258  | 74.7984  | 0 | 0 | 1 | 0 |
| 34 | Jerusalem Domari | Indo-Aryan | 31.7685  | 35.21268 | 0 | 0 | 0 | 0 |
| 35 | Gade Lohar       | Indo-Aryan | 28.6656  | 77.18861 | 0 | 0 | 1 | 0 |
| 36 | Garhwali         | Indo-Aryan | 30.5061  | 78.7201  | 0 | 0 | 0 | 0 |
| 37 | Gawarbati        | Indo-Aryan | 35.1982  | 71.5428  | 0 | 0 | 1 | 0 |

|    |                                     |            |          |          |   |   |   |   |
|----|-------------------------------------|------------|----------|----------|---|---|---|---|
| 38 | Ghatoali                            | Indo-Aryan | 24.37519 | 87.42831 | 0 | 0 | 1 | 1 |
| 39 | Ghullia Goalpara                    | Indo-Aryan | 26.031   | 89.96627 | 0 | 0 | 0 | 0 |
| 40 | Gojari                              | Indo-Aryan | 34.3768  | 73.1461  | 0 | 0 | 1 | 0 |
| 41 | Grangali                            | Indo-Aryan | 34.6485  | 70.7323  | 0 | 0 | 1 | 0 |
| 42 | Gujarati (Standard)                 | Indo-Aryan | 22.687   | 71.0962  | 0 | 0 | 1 | 0 |
| 43 | Hadoti                              | Indo-Aryan | 24.8546  | 75.8366  | 0 | 0 | 1 | 0 |
| 44 | Hajong                              | Indo-Aryan | 25.52436 | 91.70686 | 0 | 0 | 0 | 0 |
| 45 | Halbi                               | Indo-Aryan | 20.3081  | 81.3742  | 0 | 0 | 0 | 0 |
| 46 | Hindi                               | Indo-Aryan | 25.31891 | 82.98115 | 0 | 0 | 1 | 1 |
| 47 | Hindko                              | Indo-Aryan | 34.00044 | 71.54653 | 0 | 0 | 1 | 1 |
| 48 | Indus Kohistani (Bhatise dialect)   | Indo-Aryan | 34.90849 | 72.8664  | 0 | 0 | 1 | 1 |
| 49 | Indus Kohistani (Kinyawali dialect) | Indo-Aryan | 35.7054  | 73.41552 | 0 | 0 | 1 | 1 |
| 50 | Jangli                              | Indo-Aryan | 31.44641 | 73.01173 | 0 | 0 | 1 | 1 |
| 51 | Jaunsari                            | Indo-Aryan | 30.5587  | 77.9084  | 0 | 0 | 1 | 0 |
| 52 | Jharua Goalpara                     | Indo-Aryan | 26.32117 | 90.44095 | 0 | 0 | 0 | 0 |
| 53 | Kacchi                              | Indo-Aryan | 23.83    | 69       | 0 | 0 | 1 | 0 |
| 54 | Kalam Kohistani (Gawri)             | Indo-Aryan | 35.5303  | 72.5738  | 0 | 0 | 0 | 0 |
| 55 | Kalasha (Bumburet dialect)          | Indo-Aryan | 35.6415  | 71.6657  | 0 | 0 | 0 | 0 |
| 56 | Kalkoti                             | Indo-Aryan | 35.3651  | 72.0533  | 0 | 0 | 0 | 0 |
| 57 | Kanauji                             | Indo-Aryan | 26.45035 | 80.31733 | 0 | 0 | 1 | 1 |
| 58 | Kangri                              | Indo-Aryan | 31.915   | 76.366   | 0 | 0 | 1 | 0 |



|    |                   |            |          |          |   |   |   |   |
|----|-------------------|------------|----------|----------|---|---|---|---|
| 59 | Kashmiri          | Indo-Aryan | 34.16683 | 74.33046 | 0 | 0 | 0 | 0 |
| 60 | Kathoriya Tharu   | Indo-Aryan | 28.5867  | 80.8931  | 0 | 0 | 0 | 0 |
| 61 | Khandeshi Ahirani | Indo-Aryan | 20.96524 | 75.53569 | 0 | 0 | 0 | 0 |
| 62 | Kharia Thar       | Indo-Aryan | 22.245   | 83.799   | 0 | 0 | 1 | 1 |
| 63 | Khetrani          | Indo-Aryan | 30.4799  | 70.2828  | 0 | 0 | 1 | 1 |
| 64 | Khowar            | Indo-Aryan | 36       | 72       | 0 | 0 | 0 | 0 |
| 65 | Konkani           | Indo-Aryan | 15.41831 | 73.90778 | 0 | 0 | 0 | 0 |
| 66 | Kumauni           | Indo-Aryan | 29.5622  | 80.0171  | 0 | 0 | 1 | 0 |
| 67 | Kundal Shahi      | Indo-Aryan | 34.79582 | 74.19444 | 0 | 0 | 1 | 0 |
| 68 | Kupia             | Indo-Aryan | 18.38702 | 82.52986 | 0 | 0 | 0 | 0 |
| 69 | Kvari (Pahari)    | Indo-Aryan | 31.20071 | 78.06368 | 0 | 0 | 1 | 0 |
| 70 | Lahndi (Awankari) | Indo-Aryan | 33.76941 | 72.35813 | 0 | 0 | 1 | 0 |
| 71 | Lamani            | Indo-Aryan | 16.5734  | 76.9717  | 0 | 0 | 0 | 0 |
| 72 | Lawatiyya         | Indo-Aryan | 23.6322  | 58.4916  | 0 | 0 | 0 | 0 |
| 73 | Lodhi (Midnapur)  | Indo-Aryan | 22.42553 | 87.31931 | 0 | 0 | 1 | 1 |
| 74 | Magahi            | Indo-Aryan | 25.0915  | 85.3335  | 0 | 0 | 1 | 1 |
| 75 | Mahl              | Indo-Aryan | 10.91367 | 72.67851 | 0 | 0 | 1 | 0 |
| 76 | Maithili          | Indo-Aryan | 26.3817  | 86.2211  | 0 | 0 | 0 | 0 |
| 77 | Malhoriya         | Indo-Aryan | 28.51034 | 81.10905 | 0 | 0 | 0 | 0 |
| 78 | Malpahariya       | Indo-Aryan | 24.37519 | 87.42831 | 0 | 0 | 1 | 1 |
| 79 | Malvi (Central)   | Indo-Aryan | 23.17636 | 75.78557 | 0 | 0 | 0 | 0 |

|     |                              |            |          |          |   |   |   |   |
|-----|------------------------------|------------|----------|----------|---|---|---|---|
| 80  | Malvi (Rajwadi)              | Indo-Aryan | 23.33144 | 75.03743 | 0 | 0 | 0 | 0 |
| 81  | Malvi (Sondhwadi)            | Indo-Aryan | 23.42712 | 76.27289 | 0 | 0 | 0 | 0 |
| 82  | Malvi (Umathwadi)            | Indo-Aryan | 24.00752 | 76.72822 | 0 | 0 | 0 | 0 |
| 83  | Mandeali                     | Indo-Aryan | 31.5425  | 77.0419  | 0 | 0 | 0 | 0 |
| 84  | Mankiyali                    | Indo-Aryan | 34.31748 | 73.15548 | 0 | 0 | 1 | 0 |
| 85  | Marathi                      | Indo-Aryan | 17.9344  | 76.6665  | 0 | 0 | 0 | 0 |
| 86  | Marwari (Indian)             | Indo-Aryan | 27.002   | 75.0656  | 0 | 0 | 1 | 0 |
| 87  | Marwari (Northern, Pakistan) | Indo-Aryan | 28.41633 | 70.30312 | 0 | 0 | 1 | 0 |
| 88  | Marwari (Southern, Pakistan) | Indo-Aryan | 26.04137 | 68.9473  | 0 | 0 | 1 | 0 |
| 89  | Mewari                       | Indo-Aryan | 24.57    | 73.68    | 0 | 0 | 1 | 0 |
| 90  | Mewati                       | Indo-Aryan | 27.736   | 76.947   | 0 | 0 | 1 | 0 |
| 91  | Morang Tharu                 | Indo-Aryan | 26.63624 | 87.47743 | 0 | 0 | 0 | 0 |
| 92  | Naibariya Kampur             | Indo-Aryan | 26.44575 | 91.4399  | 0 | 0 | 0 | 0 |
| 93  | Nepali                       | Indo-Aryan | 28       | 85       | 0 | 0 | 0 | 0 |
| 94  | Odki                         | Indo-Aryan | 27.53636 | 67.84754 | 0 | 0 | 1 | 0 |
| 95  | Oriya (Standard)             | Indo-Aryan | 20.46662 | 85.88663 | 0 | 0 | 0 | 0 |
| 96  | Pahari                       | Indo-Aryan | 34.35909 | 73.49501 | 0 | 0 | 1 | 0 |
| 97  | Pahariya                     | Indo-Aryan | 22.89233 | 86.21702 | 0 | 0 | 1 | 1 |
| 98  | Palasbaria Kampur            | Indo-Aryan | 26.12125 | 91.54089 | 0 | 0 | 0 | 0 |
| 99  | Palula                       | Indo-Aryan | 35.5096  | 71.8421  | 0 | 0 | 1 | 0 |
| 100 | Pangwali                     | Indo-Aryan | 32.9753  | 76.5569  | 0 | 0 | 1 | 0 |

|     |                                |            |          |          |   |   |   |   |
|-----|--------------------------------|------------|----------|----------|---|---|---|---|
| 101 | Parkari                        | Indo-Aryan | 24.486   | 69.9423  | 0 | 0 | 1 | 0 |
| 102 | Pashai (Darra-i-Nur)           | Indo-Aryan | 34.71131 | 70.16884 | 0 | 0 | 1 | 0 |
| 103 | Punjabi (Lyallpuri, Western)   | Indo-Aryan | 31.43393 | 73.07899 | 0 | 0 | 1 | 0 |
| 104 | Rajbanshi                      | Indo-Aryan | 26.52195 | 88.03858 | 0 | 0 | 0 | 0 |
| 105 | Rana Tharu                     | Indo-Aryan | 28.6483  | 80.4419  | 0 | 0 | 0 | 0 |
| 106 | Rathawi                        | Indo-Aryan | 22.309   | 73.186   | 0 | 0 | 1 | 0 |
| 107 | Romani (Mitrovica )            | Indo-Aryan | 38.11977 | 13.36417 | 0 | 0 | 0 | 0 |
| 108 | Sambalpuri (Western Oriya)     | Indo-Aryan | 21.46524 | 83.97522 | 0 | 0 | 0 | 0 |
| 109 | Sansiboli                      | Indo-Aryan | 28.7364  | 72.6838  | 0 | 0 | 1 | 0 |
| 110 | Saptariya Tharu                | Indo-Aryan | 26.60889 | 86.74079 | 0 | 0 | 0 | 0 |
| 111 | Saurashtra (Northern Tirupati) | Indo-Aryan | 13.63516 | 79.41328 | 0 | 0 | 0 | 0 |
| 112 | Saurashtri (Southern)          | Indo-Aryan | 9.99     | 77.94    | 0 | 0 | 0 | 0 |
| 113 | Sawi                           | Indo-Aryan | 35.16729 | 71.4604  | 0 | 0 | 1 | 0 |
| 114 | Shekhawati                     | Indo-Aryan | 27.34    | 75.407   | 0 | 0 | 1 | 0 |
| 115 | Shina (Gilgiti)                | Indo-Aryan | 34.6515  | 75.287   | 0 | 0 | 1 | 0 |
| 116 | Shina (Gurezi)                 | Indo-Aryan | 34.65198 | 74.73554 | 0 | 0 | 1 | 0 |
| 117 | Shumashti                      | Indo-Aryan | 34.4756  | 70.5696  | 0 | 0 | 1 | 0 |
| 118 | Sindhi                         | Indo-Aryan | 26       | 69       | 0 | 0 | 1 | 0 |
| 119 | Sinhala                        | Indo-Aryan | 8        | 81       | 0 | 0 | 0 | 0 |
| 120 | Siraiiki                       | Indo-Aryan | 29.5534  | 71.906   | 0 | 0 | 1 | 1 |
| 121 | Sylheti                        | Indo-Aryan | 24.83724 | 92.25347 | 0 | 0 | 1 | 1 |

|     |                     |            |          |          |   |   |   |   |
|-----|---------------------|------------|----------|----------|---|---|---|---|
| 122 | Tharadri            | Indo-Aryan | 25.28633 | 69.24985 | 0 | 0 | 1 | 0 |
| 123 | Torwali             | Indo-Aryan | 35.14066 | 72.57615 | 0 | 0 | 1 | 0 |
| 124 | Urdu                | Indo-Aryan | 25       | 67       | 0 | 0 | 1 | 0 |
| 125 | Ushojo              | Indo-Aryan | 35.12754 | 72.60976 | 0 | 0 | 1 | 0 |
| 126 | Vaagriboli          | Indo-Aryan | 12.215   | 79.5335  | 0 | 0 | 1 | 0 |
| 127 | Vagher (Okhamandal) | Indo-Aryan | 22.46713 | 69.07239 | 0 | 0 | 1 | 1 |
| 128 | Wadiyara            | Indo-Aryan | 26.0713  | 72.1312  | 0 | 0 | 1 | 0 |
| 129 | Wagdi               | Indo-Aryan | 23.84147 | 73.71452 | 0 | 0 | 0 | 0 |
| 130 | Zargari             | Indo-Aryan | 36.056   | 50.38167 | 0 | 0 | 0 | 0 |
| 131 | Badakhshani         | Iranian    | 36.95089 | 71.14553 | 0 | 0 | 0 | 0 |
| 132 | Bakhtiari           | Iranian    | 31.96296 | 49.28748 | 0 | 0 | 0 | 0 |
| 133 | Balochi (Eastern)   | Iranian    | 28       | 62       | 0 | 0 | 1 | 0 |
| 134 | Bandari             | Iranian    | 27.18164 | 56.26589 | 0 | 0 | 0 | 0 |
| 135 | Chali Tati          | Iranian    | 35.89783 | 49.77159 | 0 | 0 | 0 | 0 |
| 136 | Danesfani Tati      | Iranian    | 35.81241 | 49.74392 | 0 | 0 | 0 | 0 |
| 137 | Dari                | Iranian    | 31.0405  | 67.3593  | 0 | 0 | 0 | 0 |
| 138 | Dezfuli             | Iranian    | 32.38308 | 48.42036 | 0 | 0 | 0 | 0 |
| 139 | Ebrahim-Abadi Tati  | Iranian    | 35.81853 | 49.87443 | 0 | 0 | 0 | 0 |
| 140 | Esfarvarini Tati    | Iranian    | 35.93595 | 49.74928 | 0 | 0 | 0 | 0 |
| 141 | Eshtehardi Tati     | Iranian    | 35.72442 | 50.36567 | 0 | 0 | 0 | 0 |
| 142 | Gilaki              | Iranian    | 37.1344  | 49.8359  | 0 | 0 | 0 | 0 |

|     |                         |         |          |          |   |   |   |   |
|-----|-------------------------|---------|----------|----------|---|---|---|---|
| 143 | Hamdan (Jewish dialect) | Iranian | 34.29327 | 48.794   | 0 | 0 | 0 | 0 |
| 144 | Hawrami                 | Iranian | 35.26251 | 46.06212 | 0 | 0 | 0 | 0 |
| 145 | Ishkashimi              | Iranian | 36.67    | 71.55    | 0 | 0 | 0 | 0 |
| 146 | Jawshaqani              | Iranian | 33.59086 | 51.21255 | 0 | 0 | 0 | 0 |
| 147 | Juhuri                  | Iranian | 42.06255 | 48.29084 | 0 | 0 | 0 | 0 |
| 148 | Keshmi                  | Iranian | 26.81261 | 55.89464 | 0 | 0 | 0 | 0 |
| 149 | Khalkhal                | Iranian | 37.42828 | 48.17929 | 0 | 0 | 0 | 0 |
| 150 | Khufi                   | Iranian | 37.89054 | 72.2098  | 0 | 0 | 0 | 0 |
| 151 | Koroshi                 | Iranian | 29.441   | 53.008   | 0 | 0 | 0 | 0 |
| 152 | Kumzari                 | Iranian | 26.1602  | 56.4202  | 1 | 0 | 0 | 0 |
| 153 | Kurdish (Sanandaji)     | Iranian | 35.3194  | 46.99287 | 0 | 0 | 0 | 0 |
| 154 | Kurdish (Sorani)        | Iranian | 35.55894 | 45.4348  | 0 | 0 | 0 | 0 |
| 155 | Kurdish (Kurmanji)      | Iranian | 38.15308 | 42.95949 | 0 | 0 | 0 | 0 |
| 156 | Kurdish (Mukri)         | Iranian | 36.76764 | 45.72447 | 0 | 0 | 0 | 0 |
| 157 | Luri (Southern)         | Iranian | 31.95969 | 50.5124  | 0 | 0 | 0 | 0 |
| 158 | Madagalashti            | Iranian | 35.66369 | 71.91755 | 0 | 0 | 0 | 0 |
| 159 | Mazandarani             | Iranian | 36.241   | 52.3009  | 0 | 0 | 0 | 0 |
| 160 | Meimei                  | Iranian | 33.44715 | 51.17156 | 0 | 0 | 0 | 0 |
| 161 | Munji                   | Iranian | 35.9321  | 70.9404  | 0 | 0 | 0 | 0 |
| 162 | Ormuri                  | Iranian | 32.6819  | 69.3444  | 0 | 0 | 1 | 0 |
| 163 | Parachi                 | Iranian | 36.0432  | 70.8805  | 0 | 0 | 1 | 0 |

|     |                   |         |          |          |   |   |   |   |
|-----|-------------------|---------|----------|----------|---|---|---|---|
| 164 | Pashto (Central)  | Iranian | 31.9153  | 69.4529  | 0 | 0 | 1 | 0 |
| 165 | Persian (Tehran)  | Iranian | 35.69983 | 51.39258 | 0 | 0 | 0 | 0 |
| 166 | Rushani           | Iranian | 37.90267 | 72.16774 | 0 | 0 | 0 | 0 |
| 167 | Sabzevari         | Iranian | 36.21604 | 57.66756 | 0 | 0 | 0 | 0 |
| 168 | Sagz-abadi (Tati) | Iranian | 35.76913 | 49.93851 | 0 | 0 | 0 | 0 |
| 169 | Sanglichi         | Iranian | 36.45    | 71.3     | 0 | 0 | 0 | 0 |
| 170 | Sarikoli          | Iranian | 37.905   | 75.1449  | 0 | 0 | 0 | 0 |
| 171 | Shabaki           | Iranian | 36.375   | 43.144   | 0 | 0 | 0 | 0 |
| 172 | Shughni           | Iranian | 37.5018  | 71.7925  | 0 | 0 | 0 | 0 |
| 173 | Sivandi           | Iranian | 30.08    | 52.92    | 0 | 0 | 0 | 0 |
| 174 | Tajiki            | Iranian | 38.8213  | 68.5549  | 0 | 0 | 0 | 0 |
| 175 | Takestani Tati    | Iranian | 36.07179 | 49.70045 | 0 | 0 | 0 | 0 |
| 176 | Taleshi           | Iranian | 38.23987 | 48.30021 | 0 | 0 | 0 | 0 |
| 177 | Talysh (Northern) | Iranian | 39.04314 | 48.60333 | 0 | 0 | 0 | 0 |
| 178 | Wakhi             | Iranian | 36.30526 | 74.82358 | 0 | 0 | 0 | 0 |
| 179 | Wanetsi           | Iranian | 30.0501  | 67.8327  | 0 | 0 | 1 | 0 |
| 180 | Xiaraji (Tati)    | Iranian | 35.85087 | 49.71945 | 0 | 0 | 0 | 0 |
| 181 | Xoznini (Tati)    | Iranian | 35.86135 | 49.75665 | 0 | 0 | 0 | 0 |
| 182 | Yagnobi           | Iranian | 39.1486  | 69.2422  | 0 | 0 | 0 | 0 |
| 183 | Yazghulami        | Iranian | 38.2801  | 71.565   | 0 | 0 | 0 | 0 |
| 184 | Yidgha            | Iranian | 36.014   | 71.5077  | 0 | 0 | 1 | 0 |

|     |                    |           |          |          |   |   |   |   |
|-----|--------------------|-----------|----------|----------|---|---|---|---|
| 185 | Zazaki             | Iranian   | 37.75341 | 39.31956 | 0 | 0 | 0 | 0 |
| 186 | Ashkun             | Nuristani | 34.84277 | 70.37453 | 1 | 0 | 1 | 0 |
| 187 | Kamviri            | Nuristani | 35.68102 | 71.63731 | 1 | 0 | 1 | 0 |
| 188 | Kataviri (Eastern) | Nuristani | 35.6837  | 71.63895 | 1 | 0 | 0 | 0 |
| 189 | Kataviri (Western) | Nuristani | 35.4145  | 70.9826  | 1 | 1 | 1 | 0 |
| 190 | Mumviri            | Nuristani | 35.68108 | 71.64034 | 1 | 0 | 1 | 0 |
| 191 | Prasun             | Nuristani | 35.1731  | 70.8004  | 0 | 0 | 0 | 0 |
| 192 | Waigali            | Nuristani | 35.0358  | 70.9761  | 1 | 0 | 1 | 0 |

---

## References

- Cooper, Gregory. 2005. *Issues in the development of a writing system for the Kalasha language*. Macquarie University, Sydney dissertation. 1–259.
- Di Carlo, Pierpaolo. 2016. Retroflex vowels? phonetics, phonology, and history of unusual sounds in Kalasha and other languages of the Hindu Kush region. *Archivio per L'Antropologia e la Etnologia* CXLVI. 103–121.
- Heegård, Jan & Ida E. Mørch. 2004. Retroflex vowels and other peculiarities in the Kalasha sound system. In Anju Saxena (ed.), *Himalayan Languages: Past and Present*, 57–76. Berlin: De Gruyter.
- Kochetov, Alexei, Paul Arsenault, Jan Heegård Petersen, Sikandar Kalas & Taj Khan Kalash. 2020. Kalasha (Bumburet variety). *Journal of the International Phonetic Association*. 1–22. <https://doi.org/10.1017/S0025100319000367>.
- Nelson, David Niles. 1986. *The historical development of the Nuristani languages*. University of Minnesota, Minneapolis dissertation.
- Perder, Emil. 2013. *A grammatical description of Dameli*. Department of Linguistics, Stockholm University dissertation.
- Strand, Richard F. 2011a. The sound system of Kamviri. <https://nuristan.info/>.
- Strand, Richard F. 2011b. The sound system of Ktivrai vari. <https://nuristan.info/>.
- Turner, Ralph Lilley. 1966. *A comparative dictionary of the Indo-Aryan languages*. Britain: Oxford University Press.
