# Supplementary material for: The emergence of bunched vowels from retroflex approximants in endangered Dardic languages
Source: publisher site journal article supplement (doi:10.1515/lingvan-2021-0022), 2022-04-28
Supplement: Supplementary file 4 [file unified-test.pdf › Supplementary materials/unified-test.pdf]

## Unified biblatex style sheet for linguistics

- Blevins, Juliette. 2004. *Evolutionary phonology*. Cambridge: Cambridge University Press.
- Casali, Roderic F. 1998. Predicting ATR activity. *Chicago Linguistic Society (CLS)* 34(1). 55–68.
- Chomsky, Noam. 1969. *Aspects of the theory of syntax*. MIT Press.
- Chomsky, Noam. 1986. *Knowledge of language*. New York: Praeger.
- van Coetsem, Frans. 2000. *A general and unified theory of the transmission process in language contact*. Heidelberg: Winter.
- Franks, Steven. 2005. Bulgarian clitics are positioned in the syntax. [http://www.cogs.indiana.edu/people/homepages/franks/Bg\\_clitics\\_remark\\_dense.pdf](http://www.cogs.indiana.edu/people/homepages/franks/Bg_clitics_remark_dense.pdf) (17 May, 2006).
- Iverson, Gregory K. 1983. Korean /s/. *Journal of Phonetics* 11. 191–200.
- Iverson, Gregory K. 1989. On the category supralaryngeal. *Phonology* 6. 285–303.
- Johnson, Kyle, Mark Baker & Ian Roberts. 1989. Passive arguments raised. *Linguistic Inquiry* 20. 219–251.
- Lahiri, Aditi (ed.). 2000. *Analogy, leveling, markedness: Principles of change in phonology and morphology* (Trends in Linguistics 127). Berlin: Mouton de Gruyter.
- McCarthy, John J. & Alan S. Prince. 1999. Prosodic morphology. In John A. Goldsmith (ed.), *Phonological theory: The essential readings*, 238–288. Malden, MA & Oxford: Blackwell.
- Murray, Robert W. & Theo Vennemann. 1983. Sound change and syllable structure in Germanic phonology. *Language* 59(3). 514–528.
- Oxford English Dictionary*, 2nd edn. 1989. Oxford: Oxford University Press.
- Pedersen, Johan. 2005. The Spanish impersonal *se*-construction: Constructional variation and change. *Constructions* 1. <http://www.constructions-online.de> (3 April, 2007).
- Rissanen, Matti. 1999. Syntax. In Roger Lass (ed.), *Cambridge history of the English language*, vol. 3, 187–331. Cambridge & New York: Cambridge University Press.
- Stewart, Thomas W., Jr. 2000. *Mutation as morphology: Bases, stems, and shapes in Scottish Gaelic*. Columbus, OH: The Ohio State University dissertation.
- Webelhuth, Gert (ed.). 1995. *Government and binding theory and the minimalist program: Principles and parameters in syntactic theory*. Oxford: Blackwell.
- Yu, Alan C. L. 2003. *The morphology and phonology of infixation*. Berkeley, CA: University of California dissertation.
